# Supplementary material
Source: PubMed Central journal article supplement (PMC4151747)
Supplement: 1412535111_pnas.201412535SI.pdf [file 1412535111_pnas.201412535SI.pdf]

# Supporting Information

Hokr et al. 10.1073/pnas.1412535111

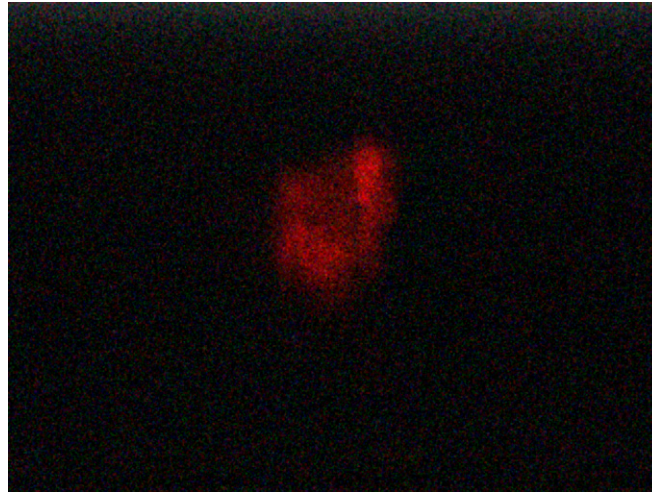

**Movie S1.** The alignment He-Ne after propagating the full 400-m path length. The oscillations seen in the beam are the result of scintillation and demonstrate the rapid deterioration of the beam quality of a high-quality Gaussian beam propagating over long distances.

[Movie S1](#)
